# Supplementary material
Source: PubMed Central journal article supplement (PMC1750922)
Supplement: pnas_0605768103_1.pdf [file pnas_0605768103_1.pdf]

**A**

## TOPFLASH

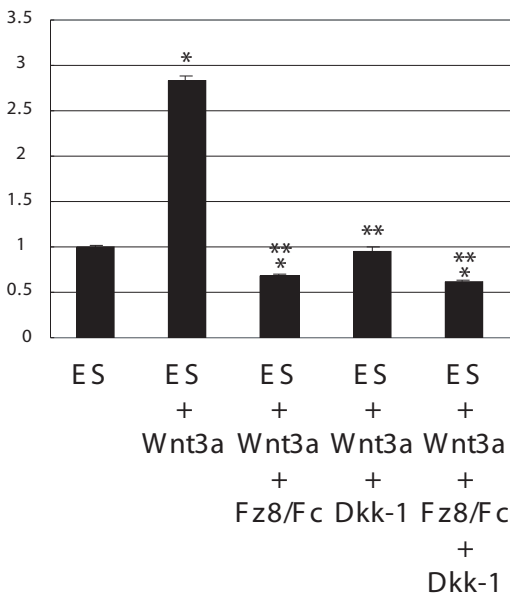**B**

## Nuclear protein

 $\beta$ -catenin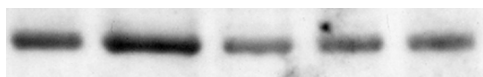

Topo-I

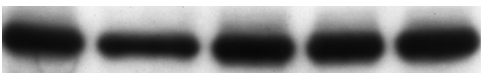

|    |       |        |       |        |
|----|-------|--------|-------|--------|
| ES | ES    | ES     | ES    | ES     |
|    | +     | +      | +     | +      |
|    | Wnt3a | Wnt3a  | Wnt3a | Wnt3a  |
|    |       | +      | +     | +      |
|    |       | Fz8/Fc | Dkk-1 | Fz8/Fc |
|    |       |        |       | +      |
|    |       |        |       | Dkk-1  |
