# Supplementary material
Source: PubMed Central journal article supplement (PMC1750922)

Csx/Nkx-2.5

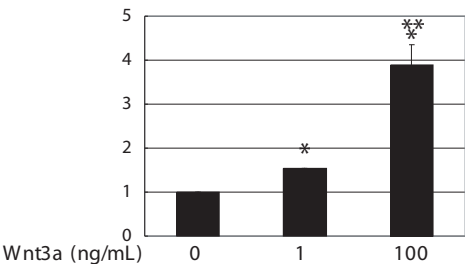

Tbx-5

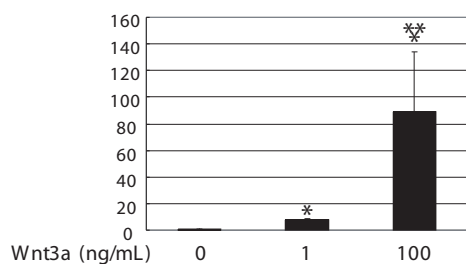

SCL

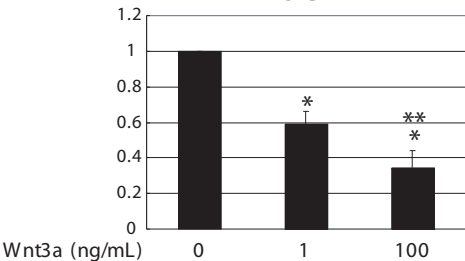

CD34

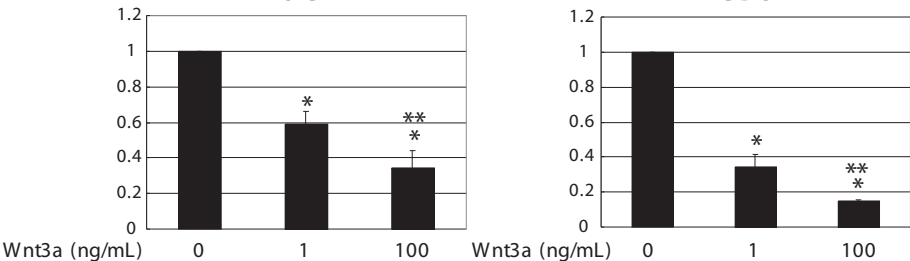

VE-cadherin

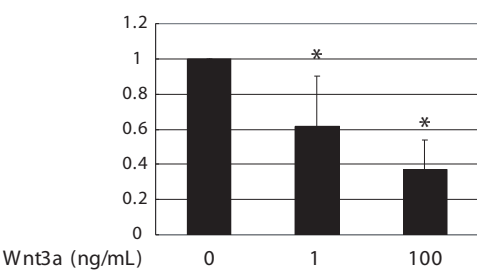

CD31

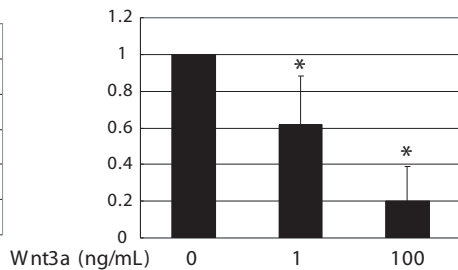

Supplement: pnas_0605768103_2.pdf [file pnas_0605768103_2.pdf]

Csx/Nkx-2.5

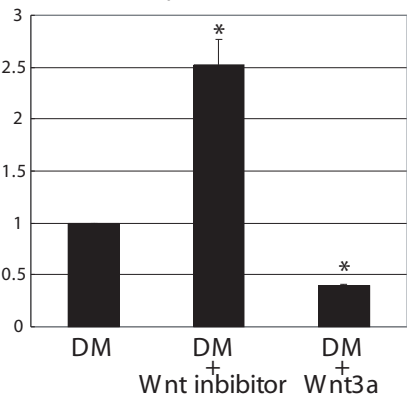

Tbx-5

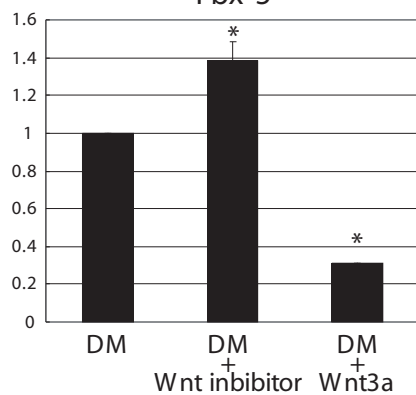 $\beta$ -MHC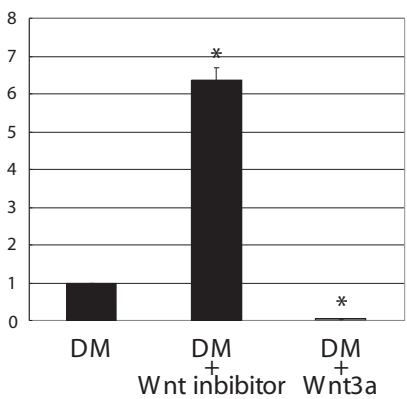

MLC-2v

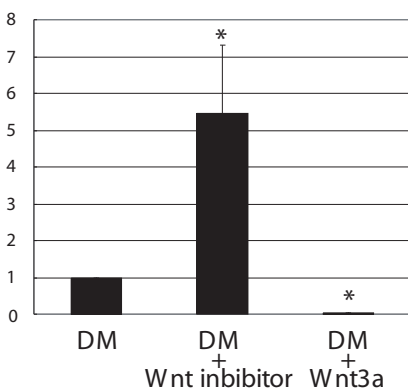

CD45

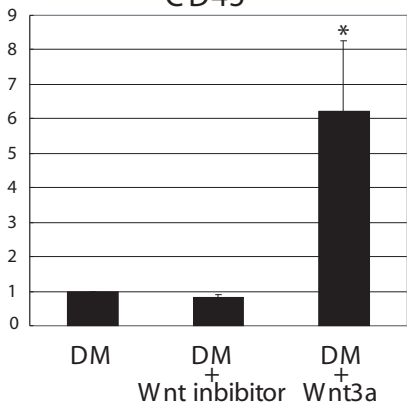 $\beta$ h1-globin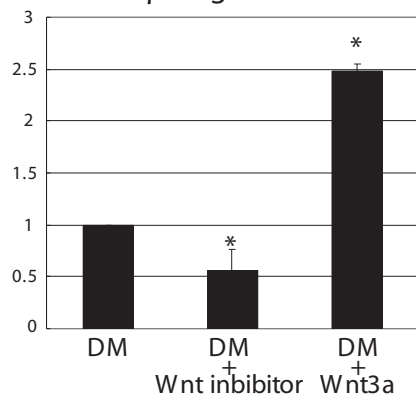

VE-cadherin

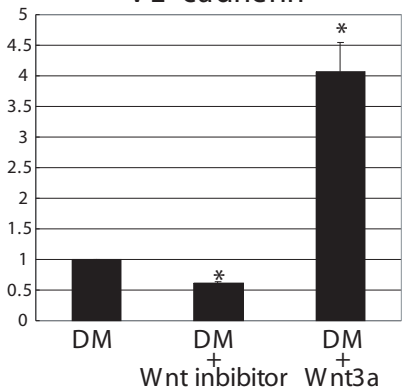

CD31

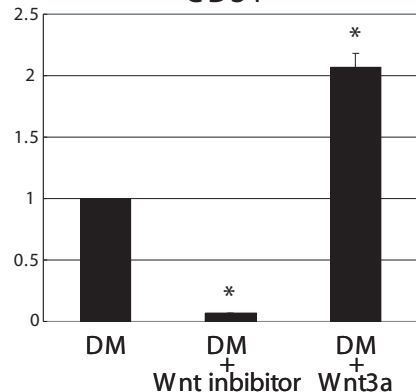

SM-MHC

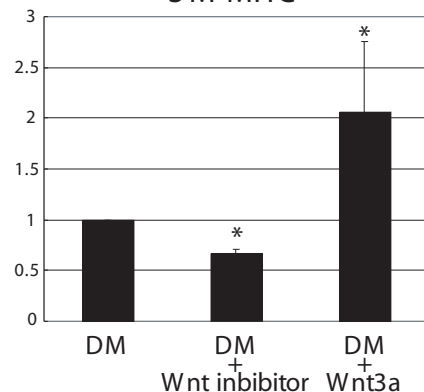

Supplement: pnas_0605768103_3.pdf [file pnas_0605768103_3.pdf]

### Csx/Nkx-2.5

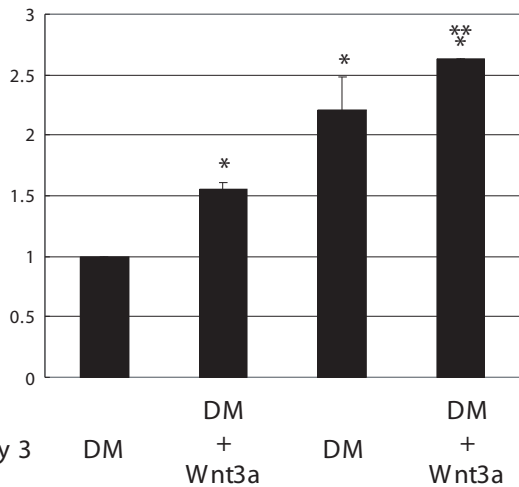

### Tbx5

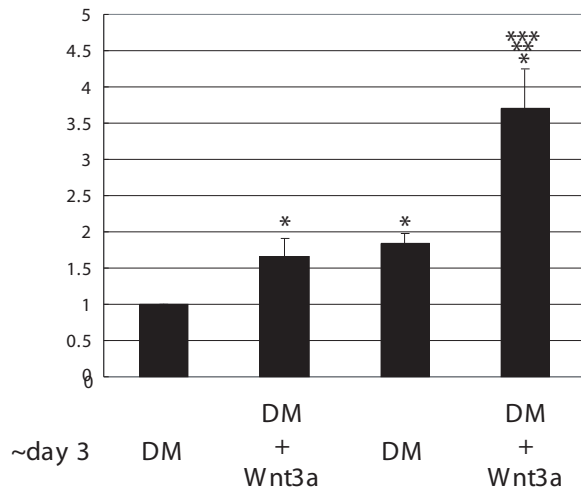

### SCL

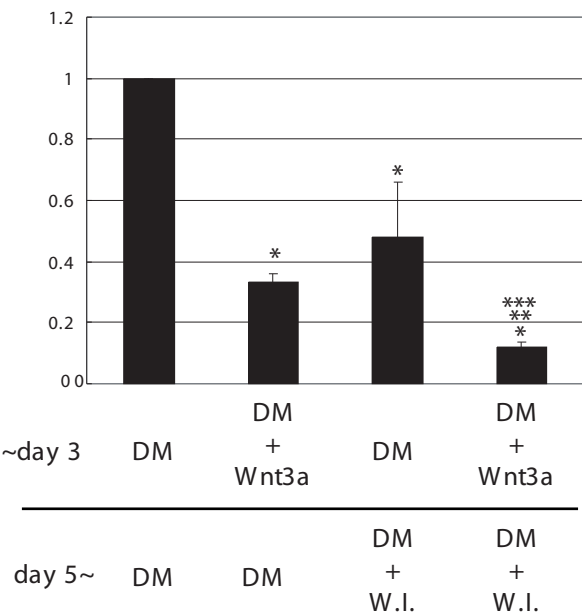

### βh1-globin

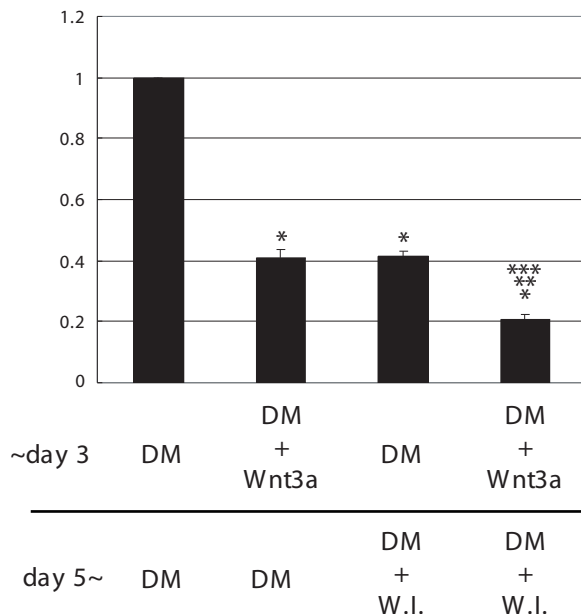

Supplement: pnas_0605768103_4.pdf [file pnas_0605768103_4.pdf]
